# Supplementary material for: Differential Network Analysis Applied to Preoperative Breast Cancer Chemotherapy Response
Source: PubMed Central journal article supplement (PMC3857210; doi:10.1371/journal.pone.0081784), 2013-12-09
Supplement: pone.0081784.s007.pdf [file pone.0081784.s007.pdf]

| Gene Symbol | Gene Name                                                                           |
|-------------|-------------------------------------------------------------------------------------|
| AGR2        | anterior gradient 2 homolog (Xenopus laevis)                                        |
| AR          | androgen receptor                                                                   |
| CCND1       | cyclin D1                                                                           |
| CDC20       | cell division cycle 20                                                              |
| CDCA8       | cell division cycle associated 8                                                    |
| CENPE       | centromere protein E, 312kDa                                                        |
| CENPN       | centromere protein N                                                                |
| COL1A2      | collagen, type I, alpha 2                                                           |
| CPB1        | carboxypeptidase B1 (tissue)                                                        |
| ESR1        | estrogen receptor 1                                                                 |
| FOXA1       | forkhead box A1                                                                     |
| GATA3       | GATA binding protein 3                                                              |
| GFRA1       | GDNF family receptor alpha 1                                                        |
| HJURP       | Holliday junction recognition protein                                               |
| IRS1        | insulin receptor substrate 1                                                        |
| KIF18A      | kinesin family member 18A                                                           |
| KIF20A      | kinesin family member 20A                                                           |
| KIFC1       | kinesin family member C1                                                            |
| KRT15       | keratin 15                                                                          |
| KRT16       | keratin 16                                                                          |
| KRT17       | keratin 17                                                                          |
| KRT7        | keratin 7                                                                           |
| LYPD3       | LY6/PLAUR domain containing 3                                                       |
| MELK        | maternal embryonic leucine zipper kinase                                            |
| MID1        | midline 1 (Opitz/BBB syndrome)                                                      |
| MYB         | v-myb myeloblastosis viral oncogene homolog (avian)                                 |
| MYBL2       | v-myb myeloblastosis viral oncogene homolog (avian)-like 2                          |
| NDC80       | NDC80 kinetochore complex component                                                 |
| PGR         | progesterone receptor                                                               |
| PLAT        | plasminogen activator, tissue                                                       |
| RUVBL2      | RuvB-like 2 (E. coli)                                                               |
| S100A1      | S100 calcium binding protein A1                                                     |
| S100A7      | S100 calcium binding protein A7                                                     |
| SERPINA3    | serpin peptidase inhibitor, clade A (alpha-1 antiproteinase, antitrypsin), member 3 |
| SERPINA5    | serpin peptidase inhibitor, clade A (alpha-1 antiproteinase, antitrypsin), member 5 |
| SERPINA6    | serpin peptidase inhibitor, clade A (alpha-1 antiproteinase, antitrypsin), member 6 |

**Table S1.** Full gene names for the gene symbols in Figure 1.
