# Supplementary material for: Differential Network Analysis Applied to Preoperative Breast Cancer Chemotherapy Response
Source: PubMed Central journal article supplement (PMC3857210; doi:10.1371/journal.pone.0081784), 2013-12-09
Supplement: pone.0081784.s008.pdf [file pone.0081784.s008.pdf]

| KPM1    | KPM2    | KPM3    | KPM4      | KPM5    |
|---------|---------|---------|-----------|---------|
| CCND1   | AKT1    | AKT1    | AKT1      | AKT1    |
| DGKI    | CCND1   | CCND1   | ANXA7     | CCND1   |
| EFNB2   | DGKI    | DGKI    | CCND1     | DEPDC6  |
| EN1     | EN1     | EFNB1   | DGKI      | DGKI    |
| EPHB3   | EPHB3   | EN1     | DOCK1     | EN1     |
| ERBB2   | ERBB2   | EPHB3   | EN1       | EPHB3   |
| FOXC1   | FOXC1   | ERBB2   | ERBB2     | ERBB2   |
| FZD1    | FZD7    | FOXC1   | FOXC1     | FOXC1   |
| FZD7    | GATA3   | FZD7    | FZD7      | FZD7    |
| GATA3   | GDNF    | GATA3   | GATA3     | GATA3   |
| GDNF    | GRB7    | GRB7    | GRB7      | GDNF    |
| GRB7    | HNF4A   | ITGA6   | HNRNPA2B1 | GRB7    |
| IGFBP4  | IGF1    | KLF5    | ITGA6     | HNF4A   |
| ITGA6   | IGFBP4  | LIPC    | KLF5      | ITGA6   |
| KLF5    | ITGA6   | LPIN1   | LIPC      | KLF5    |
| LPIN1   | KLF5    | MLST8   | LPIN1     | LPIN1   |
| MAX     | LPIN1   | MSX2    | MSX2      | MSX2    |
| MSX2    | MSX2    | NRTN    | NRTN      | NRTN    |
| NDRG2   | NRTN    | PPARG   | PPARG     | PLCG1   |
| NRTN    | PLCG1   | RASGRP3 | RASGRP3   | PPARG   |
| PLCG1   | PPARG   | RET     | RET       | RASGRP3 |
| PPARG   | RASGRP3 | RRAGC   | RXRB      | RRAGC   |
| RASGRP3 | RXRB    | RXRB    | SF3A3     | RXRB    |
| RXRB    | SHH     | SHH     | SHH       | SHH     |
| SHH     | SOX10   | SOX10   | SOX10     | SOX10   |
| SOX10   | TRIB3   | TRIB3   | TRIB3     | TRIB3   |
| WNT1    | WNT1    | WNT1    | WNT1      | WNT1    |
| ZIC1    | ZIC1    | ZIC1    | ZIC1      | ZIC1    |

**Table S2.** Genes of the top 5 KeyPathwayMiner subnetworks.
