# Supplementary material for: Differential Network Analysis Applied to Preoperative Breast Cancer Chemotherapy Response
Source: PubMed Central journal article supplement (PMC3857210; doi:10.1371/journal.pone.0081784), 2013-12-09
Supplement: pone.0081784.s009.pdf [file pone.0081784.s009.pdf]

| KPM1                                                                                                                                                                                                                                                                                                                                                                                                                                                                                                                                                                                                                                                                                                                                                                                                                                             | KPM2                                                                                                                                                                                                                                                                                                                                                                                                                                                                                                                                                                                                                                                                      | KPM3                                                                                                                                                                                                                                                                                                                                                                                                                                                                                                                                                                                                                                                                                                                                                                            | KPM4                                                                                                                                                                                                                                                                                                                                                                                                                                                                                                                                                                                                                                                                                                                                                            | KPM5                                                                                                                                                                                                                                                                                                                                                                                                                                                                                                                                                                                                                                                                                                                                                                                                                                                   |
|--------------------------------------------------------------------------------------------------------------------------------------------------------------------------------------------------------------------------------------------------------------------------------------------------------------------------------------------------------------------------------------------------------------------------------------------------------------------------------------------------------------------------------------------------------------------------------------------------------------------------------------------------------------------------------------------------------------------------------------------------------------------------------------------------------------------------------------------------|---------------------------------------------------------------------------------------------------------------------------------------------------------------------------------------------------------------------------------------------------------------------------------------------------------------------------------------------------------------------------------------------------------------------------------------------------------------------------------------------------------------------------------------------------------------------------------------------------------------------------------------------------------------------------|---------------------------------------------------------------------------------------------------------------------------------------------------------------------------------------------------------------------------------------------------------------------------------------------------------------------------------------------------------------------------------------------------------------------------------------------------------------------------------------------------------------------------------------------------------------------------------------------------------------------------------------------------------------------------------------------------------------------------------------------------------------------------------|-----------------------------------------------------------------------------------------------------------------------------------------------------------------------------------------------------------------------------------------------------------------------------------------------------------------------------------------------------------------------------------------------------------------------------------------------------------------------------------------------------------------------------------------------------------------------------------------------------------------------------------------------------------------------------------------------------------------------------------------------------------------|--------------------------------------------------------------------------------------------------------------------------------------------------------------------------------------------------------------------------------------------------------------------------------------------------------------------------------------------------------------------------------------------------------------------------------------------------------------------------------------------------------------------------------------------------------------------------------------------------------------------------------------------------------------------------------------------------------------------------------------------------------------------------------------------------------------------------------------------------------|
| <p>Differentiation of cells</p> <p>Proliferation of neuronal cells</p> <p>Migration of neural crest cells</p> <p>Cell movement</p> <p>Development of central nervous system</p> <p>Migration of cells</p> <p>Transactivation of RNA</p> <p>Expression of RNA</p> <p>Transcription of RNA</p> <p>Proliferation of cells</p> <p>Development of autonomic nervous system</p> <p>Transcription of DNA</p> <p>Apoptosis</p> <p>Abnormal morphology of embryonic tissue</p> <p>Development of brain</p> <p>Differentiation of muscle cells</p> <p>Development of lymphatic system component</p> <p>Morphology of head</p> <p>Morphology of nervous system</p> <p>Activation of DNA endogenous promoter</p> <p>Development of body axis</p> <p>Abnormal morphology of endolymphatic duct</p> <p>Proliferation of epithelial cells</p> <p>Cell death</p> | <p>Differentiation of cells</p> <p>Proliferation of neuronal cells</p> <p>Transactivation of RNA</p> <p>Development of central nervous system</p> <p>Expression of RNA</p> <p>Transcription of RNA</p> <p>Differentiation of adipocytes</p> <p>Morphology of nervous system</p> <p>Activation of DNA endogenous promoter</p> <p>Development of sensory organ</p> <p>Cell movement</p> <p>Proliferation of embryonic cells</p> <p>Migration of neural crest cells</p> <p>Differentiation of muscle cells</p> <p>Apoptosis</p> <p>Development of brain</p> <p>Survival of dopaminergic neurons</p> <p>Morphology of brain</p> <p>Development of cells</p> <p>Hypoplasia</p> | <p>Differentiation of cells</p> <p>Migration of neural crest cells</p> <p>Proliferation of neuronal cells</p> <p>Morphology of nervous system</p> <p>Development of thymus gland</p> <p>Transactivation of RNA</p> <p>Development of central nervous system</p> <p>Expression of RNA</p> <p>Morphology of brain</p> <p>Development of lymphatic system component</p> <p>Transcription of DNA</p> <p>Hypoplasia</p> <p>Morphology of head</p> <p>Differentiation of adipocytes</p> <p>Quantity of tumor</p> <p>Development of autonomic nervous system</p> <p>Transcription of DNA</p> <p>Triple-negative breast cancer</p> <p>Development of tumor</p> <p>Cell viability of neurons</p> <p>Proliferation of embryonic cells</p> <p>Differentiation of fibroblast cell lines</p> | <p>Differentiation of cells</p> <p>Proliferation of neuronal cells</p> <p>Expression of RNA</p> <p>Transcription of RNA</p> <p>Development of tumor</p> <p>Migration of neural crest cells</p> <p>Transactivation of RNA</p> <p>Hypoplasia</p> <p>Quantity of tumor</p> <p>Development of autonomic nervous system</p> <p>Transcription of DNA</p> <p>Differentiation of tumor cells</p> <p>Triple-negative breast cancer</p> <p>Development of central nervous system</p> <p>Proliferation of embryonic cells</p> <p>Morphology of brain</p> <p>Differentiation of fibroblast cell lines</p> <p>Morphology of nervous system</p> <p>Development of cerebellum</p> <p>Cell movement</p> <p>Regulation of cells</p> <p>Proliferation of endocrine cell lines</p> | <p>Differentiation of cells</p> <p>Proliferation of neuronal cells</p> <p>Development of central nervous system</p> <p>Expression of RNA</p> <p>Transcription of RNA</p> <p>Migration of neural crest cells</p> <p>Transactivation of DNA</p> <p>Transactivation of RNA</p> <p>Differentiation of adipocytes</p> <p>Morphology of nervous system</p> <p>Activation of DNA endogenous promoter</p> <p>Development of sensory organ</p> <p>Differentiation of tumor cells</p> <p>Development of sensory organ</p> <p>Apoptosis</p> <p>Development of tumor</p> <p>Development of thymus gland</p> <p>Proliferation of embryonic cells</p> <p>Induction of tumor</p> <p>Morphology of brain</p> <p>Differentiation of fibroblast cell lines</p> <p>Differentiation of muscle cells</p> <p>Development of lymphatic system component</p> <p>Hypoplasia</p> |

**Table S3.** Top 25 Biological Functions terms of the IPA analysis for the top 5 KeyPathwayMiner subnetworks.
