# Supplementary material for: Differential Network Analysis Applied to Preoperative Breast Cancer Chemotherapy Response
Source: PubMed Central journal article supplement (PMC3857210; doi:10.1371/journal.pone.0081784), 2013-12-09
Supplement: pone.0081784.s010.pdf [file pone.0081784.s010.pdf]

| Functions Annotation                               | p-value  | Molecules                                                                                                                                                                                                    |
|----------------------------------------------------|----------|--------------------------------------------------------------------------------------------------------------------------------------------------------------------------------------------------------------|
| Carcinoma                                          | 2.00E-07 | AGR2, AR, CCND1, CDC20, CDCA8, COL1A2, ESR1, FOXA1, GATA3, GFRA1, IRS1, KIF20A, KIFC1, KRT16, KRT7, MELK, MYB, MYBL2, PGR, PLAT, S100A1, SERPINA3, SERPINA5, SERPINA6, TFF1, TFF3, ZEB1                      |
| Cell cycle progression                             | 2.00E-07 | AR, CCND1, CDC20, CDCA8, CENPE, ESR1, FOXA1, GATA3, HJURP, IRS1, KIFC1, MELK, MYB, MYBL2, NDC80, PGR, SERPINA5, ZEB1                                                                                         |
| Chromosomal congression of chromosomes             | 1.58E-06 | CENPE, KIF18A, KIFC1, NDC80                                                                                                                                                                                  |
| Cancer                                             | 1.58E-06 | AGR2, AR, CCND1, CDC20, CDCA8, COL1A2, ESR1, FOXA1, GATA3, GFRA1, IRS1, KIF20A, KIFC1, KRT15, KRT16, KRT17, KRT7, MELK, MYB, MYBL2, NDC80, PGR, PLAT, S100A1, SERPINA3, SERPINA5, SERPINA6, TFF1, TFF3, ZEB1 |
| Carcinoma in breast                                | 1.58E-06 | AGR2, AR, CCND1, COL1A2, ESR1, GATA3, GFRA1, MYBL2, PGR, SERPINA5, TFF1                                                                                                                                      |
| Breast cancer                                      | 1.58E-06 | AGR2, AR, CCND1, CDC20, COL1A2, ESR1, FOXA1, GATA3, GFRA1, KRT15, KRT17, MYB, MYBL2, PGR, SERPINA5, TFF1                                                                                                     |
| Digestive organ tumor                              | 1.89E-05 | AR, CCND1, CDC20, CDCA8, COL1A2, ESR1, FOXA1, IRS1, KIF20A, KIFC1, KRT7, MELK, MYB, PGR, PLAT, SERPINA3, SERPINA6, TFF1, TFF3                                                                                |
| Proliferation of cells                             | 3.49E-05 | AGR2, AR, CCND1, CDC20, CDCA8, COL1A2, ESR1, FOXA1, GATA3, GFRA1, IRS1, KIF20A, KRT16, KRT17, MELK, MYB, MYBL2, PGR, PLAT, S100A1, S100A7, SERPINA5, SERPINH1, TFF1, TFF3, ZEB1                              |
| Proliferation of tumor cells                       | 6.25E-05 | AR, CCND1, ESR1, GFRA1, IRS1, MYB, MYBL2, PLAT, S100A7, TFF3                                                                                                                                                 |
| Plaque psoriasis                                   | 6.25E-05 | CCND1, GATA3, KRT15, KRT16, KRT17, S100A7                                                                                                                                                                    |
| Cell movement                                      | 7.72E-05 | AGR2, AR, CCND1, ESR1, FOXA1, GATA3, GFRA1, IRS1, KRT16, LYPD3, MYB, PLAT, S100A1, S100A7, SERPINA3, SERPINA5, TFF1, TFF3, ZEB1                                                                              |
| Proliferation of breast cancer cell lines          | 1.00E-04 | AR, CCND1, ESR1, IRS1, MYB, PGR, S100A1, S100A7, ZEB1                                                                                                                                                        |
| Amenorrhea                                         | 2.46E-04 | AR, PGR, SERPINA6                                                                                                                                                                                            |
| Cell cycle progression of tumor cell lines         | 2.65E-04 | AR, CCND1, ESR1, FOXA1, MELK, PGR, ZEB1                                                                                                                                                                      |
| Proliferation of cancer cells                      | 2.98E-04 | ESR1, GFRA1, IRS1, MYB, MYBL2, PLAT, S100A7, TFF3                                                                                                                                                            |
| Hyperplasia                                        | 3.32E-04 | AR, CCND1, ESR1, GATA3, IRS1, KRT16, KRT17, MYB, PGR, S100A7                                                                                                                                                 |
| Mitosis                                            | 3.98E-04 | AR, CCND1, CDC20, CDCA8, CENPE, IRS1, KIFC1, MYBL2, NDC80                                                                                                                                                    |
| Skin development                                   | 4.33E-04 | CCND1, COL1A2, GFRA1, KRT15, KRT16, KRT17, S100A7                                                                                                                                                            |
| Development of epidermis                           | 4.92E-04 | CCND1, GFRA1, KRT15, KRT16, KRT17, S100A7                                                                                                                                                                    |
| Cell cycle progression of breast cancer cell lines | 5.04E-04 | CCND1, ESR1, MELK, PGR                                                                                                                                                                                       |
| Cell viability of endometrial cells                | 5.06E-04 | ESR1, PGR                                                                                                                                                                                                    |
| Cloning of fibroblast cell lines                   | 5.06E-04 | CCND1, MYBL2                                                                                                                                                                                                 |
| Infanticide                                        | 5.06E-04 | ESR1, PGR                                                                                                                                                                                                    |
| Mammary gland development                          | 5.09E-04 | AR, CCND1, ESR1, GATA3, IRS1, PGR                                                                                                                                                                            |
| Carcinoma in situ                                  | 5.09E-04 | AR, ESR1, GATA3, KRT16, KRT7, TFF3                                                                                                                                                                           |

**Table S4.** Top 25 terms of Ingenuity Functional Enrichment Analysis for E40 gene set including associated genes and p-values (corrected for multiple testing using BenjaminiHochberg correction).
