# Supplementary material for: Differential Network Analysis Applied to Preoperative Breast Cancer Chemotherapy Response
Source: PubMed Central journal article supplement (PMC3857210; doi:10.1371/journal.pone.0081784), 2013-12-09
Supplement: pone.0081784.s011.pdf [file pone.0081784.s011.pdf]

| Functions Annotation                     | p-value  | Molecules                                                                                                                                                                                                                       |
|------------------------------------------|----------|---------------------------------------------------------------------------------------------------------------------------------------------------------------------------------------------------------------------------------|
| Transactivation                          | 2.31E-12 | AR, EP300, ESR1, GADD45G, GATA3, IGFBP4, MAPK3, MDM2, MED1, MED31, NCOA3, PRKACA, RARA, RET, SMAD3, SRC, STUB1, UBE2I, ZBTB16                                                                                                   |
| Cell movement                            | 4.89E-11 | AGR2, AR, C4B (includes others), CST3, ESR1, EVL, GATA3, GFRA1, IGF1R, IGF2, IGFBP4, IL6ST, IRS1, MAPK3, MED1, NCOA3, PRKACA, RABEP1, RARA, RET, SEMA6A, SHC1, SMAD3, SRC, TSC2, UBE2I, ZBTB16                                  |
| Cell cycle progression                   | 2.37E-10 | AR, EP300, ESR1, GADD45G, GATA3, IGF1R, IGF2, IRS1, MAPK3, MDM2, NCOA3, PRKACA, RARA, RET, SHC1, SMAD3, SRC, TSC2, UBE2I, YWHAB, ZBTB16                                                                                         |
| Migration of cells                       | 2.44E-10 | AR, C4B (includes others), CST3, ESR1, EVL, GATA3, GFRA1, IGF1R, IGF2, IGFBP4, IL6ST, IRS1, MAPK3, NCOA3, PRKACA, RABEP1, RARA, RET, SEMA6A, SHC1, SMAD3, SRC, TSC2, UBE2I, ZBTB16                                              |
| Proliferation of tumor cell lines        | 1.96E-09 | AR, EP300, ESR1, GADD45G, IGF1R, IGF2, IGFBP4, IL6ST, IRS1, MAPK3, MDM2, MED1, NCOA3, PRKACA, RARA, RET, SHC1, SMAD3, SRC, STUB1, UBE2I, ZBTB16                                                                                 |
| Apoptosis of tumor cell lines            | 3.95E-09 | AR, EP300, ESR1, GADD45G, IGF1R, IGF2, IGFBP4, IL6ST, MAPK3, MDM2, NCOA3, PRKACA, RARA, RET, SHC1, SMAD3, SRC, STUB1, TSC2, ZBTB16                                                                                              |
| Proliferation of connective tissue cells | 5.15E-09 | AR, ESR1, IGF1R, IGF2, IGFBP4, IL6ST, IRS1, MAPK3, MDM2, MED1, RARA, RET, SMAD3, SRC, TSC2                                                                                                                                      |
| Proliferation of cells                   | 5.15E-09 | AGR2, AR, ASH2L, CALM1 (includes others), CST3, EP300, ESR1, GADD45G, GATA3, GFRA1, IGF1R, IGF2, IGFBP4, IL6ST, IRS1, MAPK3, MDM2, MED1, NCOA3, PRKACA, RABEP1, RARA, RET, SEMA6A, SHC1, SMAD3, SRC, STUB1, TSC2, UBE2I, ZBTB16 |
| Necrosis                                 | 5.15E-09 | AGR2, AR, CST3, EP300, ESR1, GADD45G, GATA3, GFRA1, IGF1R, IGF2, IGFBP4, IL6ST, IRS1, MAPK3, MDM2, MED1, NCOA3, PRKACA, RARA, RET, SHC1, SMAD3, SRC, STUB1, TSC2, YWHAB, ZBTB16                                                 |
| Hypoplasia                               | 5.77E-09 | AR, ESR1, IGF1R, IGF2, IL6ST, MDM2, MED1, RARA, RET, SHC1, SMAD3, SRC, STUB1, TSC2                                                                                                                                              |
| Proliferation of epithelial cells        | 5.77E-09 | AGR2, AR, EP300, ESR1, IGF1R, IGF2, IGFBP4, MED1, RARA, RET, SMAD3, TSC2, ZBTB16                                                                                                                                                |
| Transcription                            | 6.11E-09 | AP1G2, AR, ASH2L, EP300, ESR1, GADD45G, GATA3, IGF2, IL6ST, MAPK3, MDM2, MED1, NCOA3, PRKACA, RARA, RET, SHC1, SMAD3, SMAD9, SRC, STUB1, UBE2I, YWHAB, ZBTB16                                                                   |
| Cell death of tumor cell lines           | 6.78E-09 | AGR2, AR, EP300, ESR1, GADD45G, IGF1R, IGF2, IGFBP4, IL6ST, MAPK3, MDM2, NCOA3, PRKACA, RARA, RET, SHC1, SMAD3, SRC, STUB1, TSC2, ZBTB16                                                                                        |
| Differentiation of cells                 | 8.30E-09 | AR, EP300, ESR1, GADD45G, GATA3, GFRA1, IGF1R, IGF2, IL6ST, IRS1, MAPK3, MDM2, MED1, NCOA3, PRKACA, RARA, RET, SHC1, SMAD3, SMAD9, SRC, TSC2, UBE2I, ZBTB16                                                                     |
| Organismal death                         | 1.29E-08 | AR, C4B (includes others), CST3, EP300, ESR1, GATA3, IGF1R, IGF2, IL6ST, MAPK3, MDM2, MED1, NCOA3, PRKACA, RARA, RET, SHC1, SMAD3, SMAD9, SRC, STUB1, TSC2                                                                      |
| Cell survival                            | 1.29E-08 | AR, EP300, ESR1, GATA3, GFRA1, IGF1R, IGF2, IL6ST, IRS1, MAPK3, MDM2, MED1, PRKACA, RARA, RET, SHC1, SMAD3, SRC, TSC2, UBE2I                                                                                                    |
| Synthesis of DNA                         | 1.32E-08 | AR, EP300, ESR1, IGF1R, IGF2, IGFBP4, IL6ST, IRS1, MDM2, PRKACA, SHC1, SRC, TSC2                                                                                                                                                |
| Transcription of RNA                     | 2.48E-08 | AR, ASH2L, EP300, ESR1, GADD45G, GATA3, IGF2, IL6ST, MAPK3, MDM2, MED1, NCOA3, PRKACA, RARA, RET, SHC1, SMAD3, SMAD9, SRC, STUB1, UBE2I, YWHAB, ZBTB16                                                                          |
| Cell viability                           | 2.62E-08 | AR, EP300, ESR1, GATA3, GFRA1, IGF1R, IGF2, IL6ST, MAPK3, MDM2, MED1, PRKACA, RARA, RET, SHC1, SMAD3, SRC, TSC2, UBE2I                                                                                                          |

Continued on next page

**Table S5 – continued from previous page**

| <b>Functions Annotation</b>    | <b>p-value</b> | <b>Molecules</b>                                                                                                                                            |
|--------------------------------|----------------|-------------------------------------------------------------------------------------------------------------------------------------------------------------|
| Binding of DNA                 | 2.80E-08       | AR, CALM1 (includes others), EP300, ESR1, GATA3, IL6ST, MAPK3, MDM2, MED1, PRKACA, RARA, SMAD3, SRC, YWHAB                                                  |
| Quantity of cells              | 3.81E-08       | AGR2, AR, C4B (includes others), EP300, ESR1, GADD45G, GATA3, GFRA1, IGF1R, IGF2, IL6ST, IRS1, MAPK3, MDM2, MED1, RARA, RET, SHC1, SMAD3, SRC, TSC2, ZBTB16 |
| Development of carcinoma       | 3.81E-08       | CST3, NCOA3, RARA, RET, SMAD3, SRC, TSC2                                                                                                                    |
| Proliferation of fibroblasts   | 4.76E-08       | ESR1, IGF1R, IGF2, IGFBP4, IL6ST, MAPK3, MDM2, RARA, SMAD3, SRC, TSC2                                                                                       |
| Development of tumor           | 4.76E-08       | CST3, ESR1, IGF1R, IL6ST, NCOA3, RARA, RET, SMAD3, SRC, TSC2, ZBTB16                                                                                        |
| Morphology of embryonic tissue | 5.03E-08       | AR, EP300, ESR1, GATA3, GFRA1, IL6ST, MDM2, PRKACA, RARA, RET, SHC1, SMAD3, SMAD9, UBE2I                                                                    |

**Table S5.** Top 25 terms of Ingenuity Functional Enrichment Analysis for O39 gene set including associated genes and p-values (corrected for multiple testing using BenjaminiHochberg correction).
